# Supplementary material for: Two Seemingly Homologous Noncoding RNAs Act Hierarchically to Activate glmS mRNA Translation
Source: PLOS journal article supplement (doi:10.1371/journal.pbio.0060064), 2008-03-14
Supplement: S4 (10.1371/journal.pbio.0060064.s004) [file journal.pbio.0060064.s004]

**Figure S4**

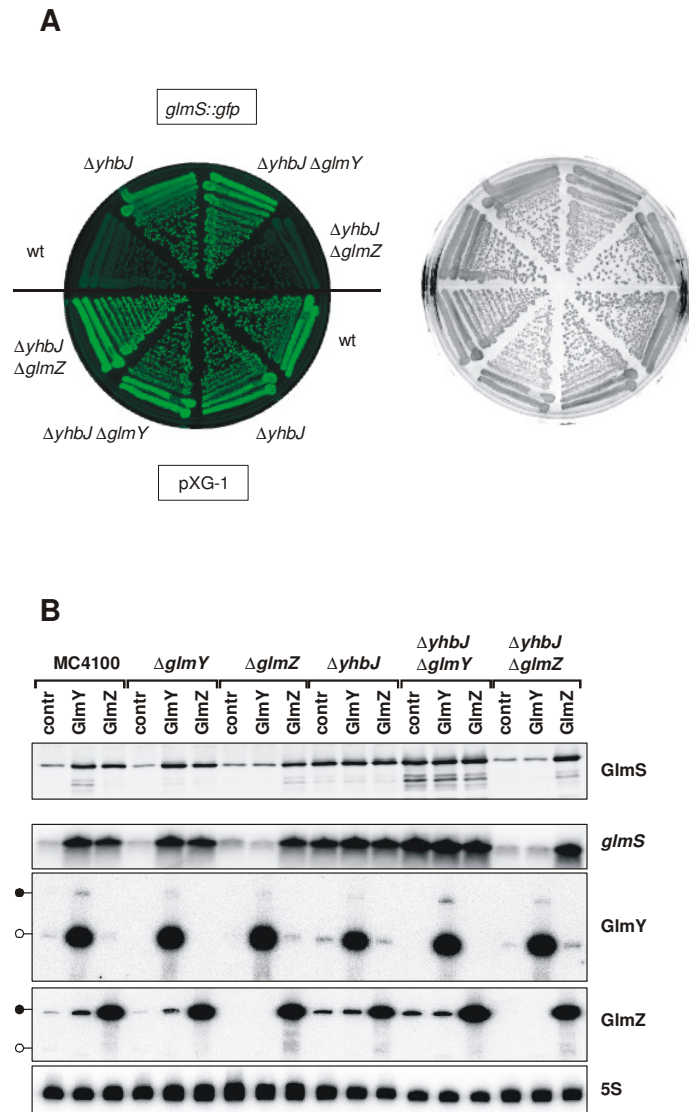

**Effect of *glmY* and *glmZ* deletion or overexpression in *E. coli yhbJ* mutant strains.** (A) Activation of a translational *glmS::gfp* fusion in a  $\Delta yhbJ$  background requires *glmZ* but not *glmY*. Colony fluorescence of *E. coli* MC4100 (wt) and mutant strains JVS-8018 ( $\Delta yhbJ$ ), JVS-8076 ( $\Delta yhbJ \Delta glmY$ ), JVS-8078 ( $\Delta yhbJ \Delta glmZ$ ) harboring plasmid *glmS::gfp* or pXG-1 (*gfp* control plasmid). Images were obtained in the fluorescence (left panel) and visual light (right panel) mode. (B) Western and Northern blot analyses (as in Figure S2) comparing the effects of GlmY and GlmZ expression in MC4100, JVS-8030 ( $\Delta glmY$ ), JVS-8024 ( $\Delta glmZ$ ), JVS-8018 ( $\Delta yhbJ$ ), JVS-8076 ( $\Delta yhbJ \Delta glmY$ ), and JVS-8078 ( $\Delta yhbJ \Delta glmZ$ ).
